# Supplementary material for: Modulating electronic properties in hydrogenated silicon nanotubes
Source: Royal Society of Chemistry journal article supplement (doi:10.1039/d4cp03703k), 2025-01-01
Supplement: d4cp03703k2.pdf [file d4cp03703k2.pdf]

# Modulating Electronic Properties in Hydrogenated Silicon Nanotubes

Hsin-Yi Liu and Jhao-Ying Wu\*

Department of Energy and Refrigerating Air-Conditioning Engineering, National

Kaohsiung University of Science and Technology, Kaohsiung, Taiwan

E-mail: yarst5@nkust.edu.tw

## Supplementary Materials

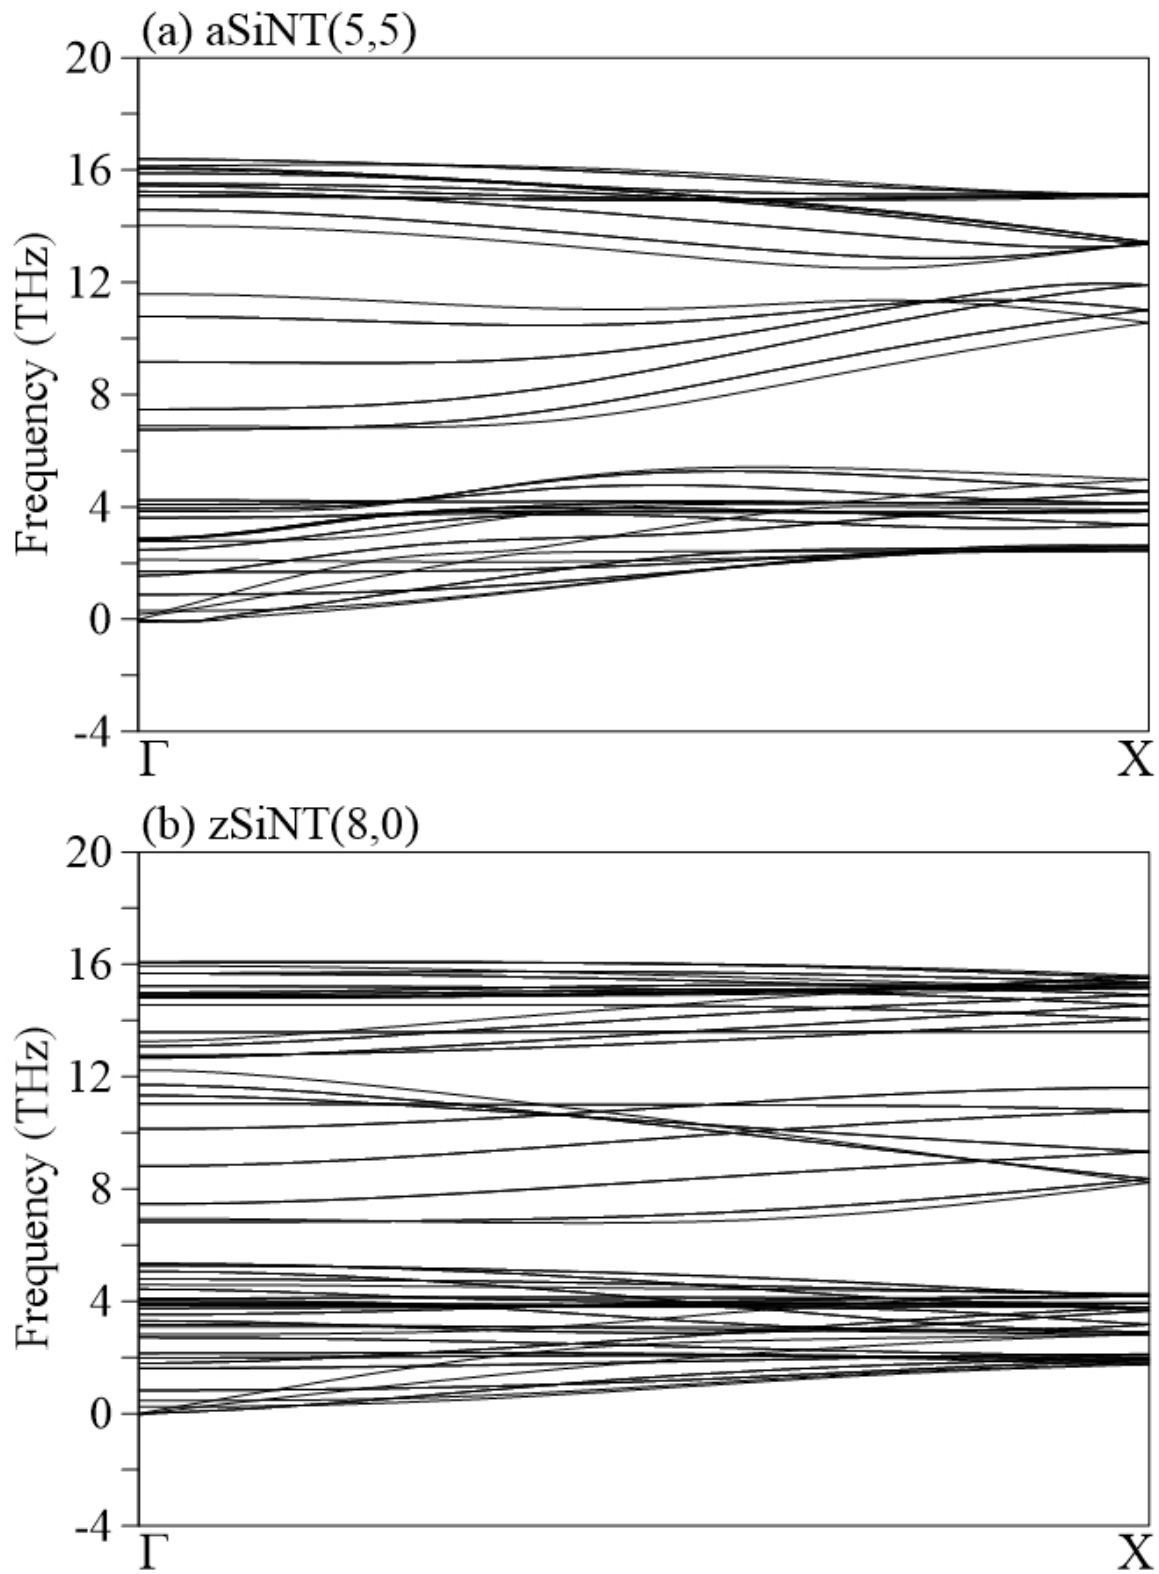

Figure S1: Phonon spectra of (a) aSiNT(5,5) and (b) zSiNT(8,0).

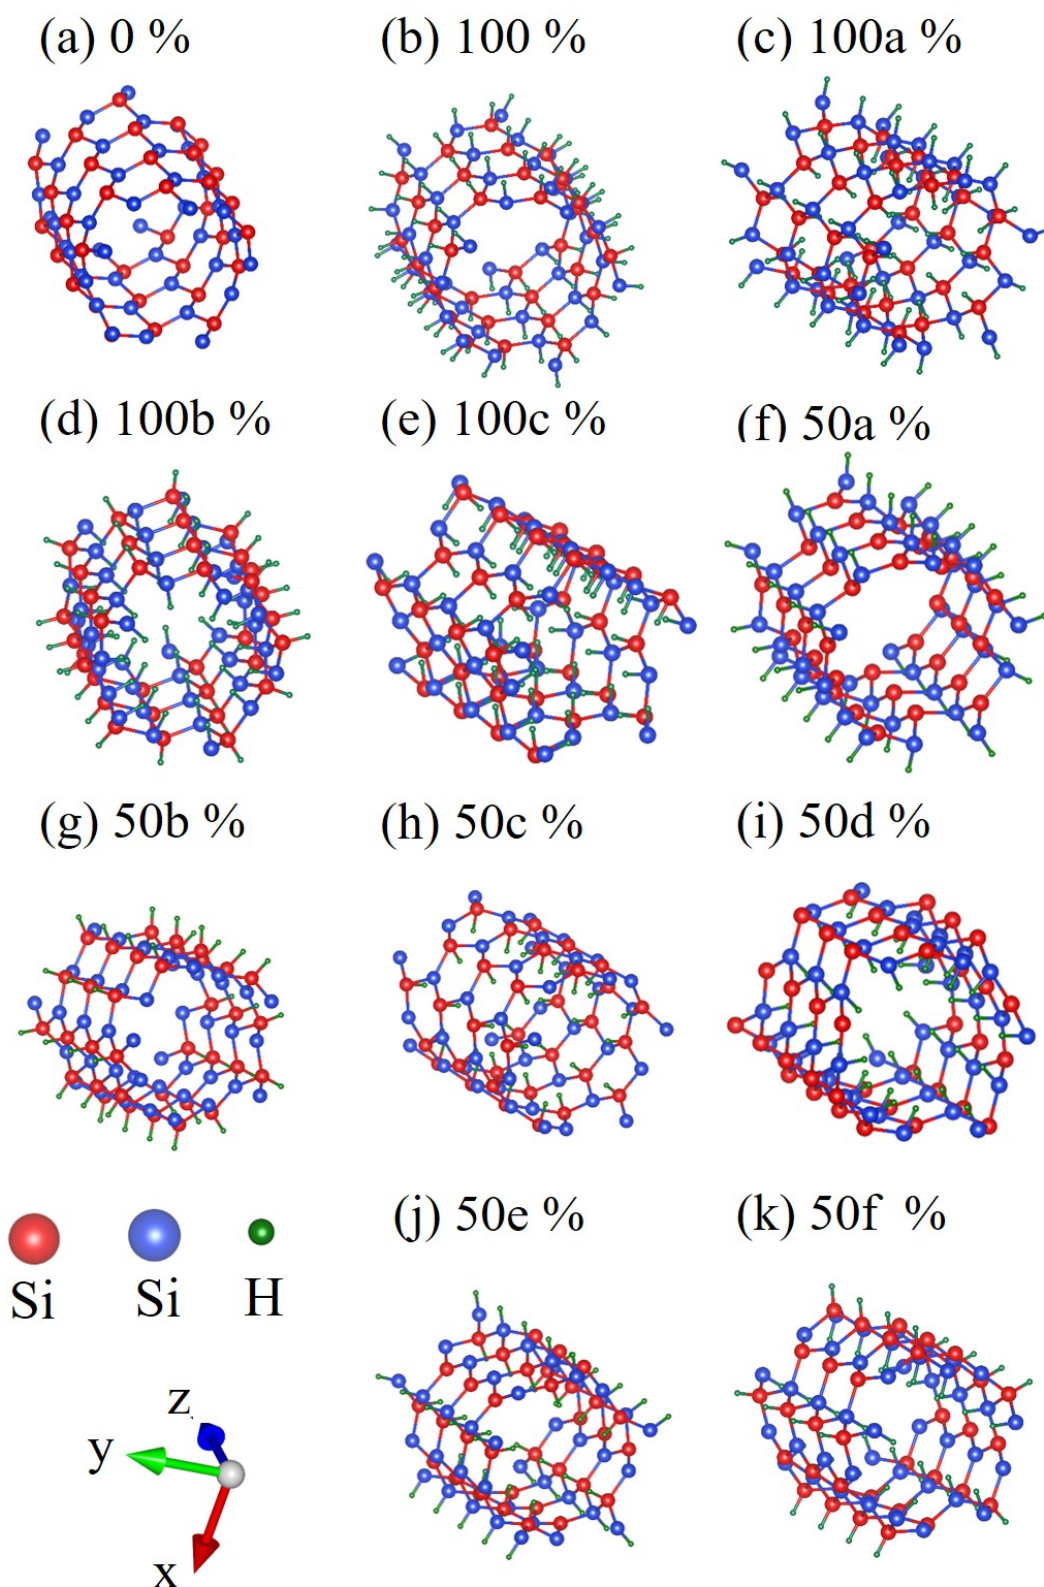

Figure S2: Tilted views of (a) pure and (b)-(k) hydrogenated Si(5,5) NTs with various adsorption types and concentrations.

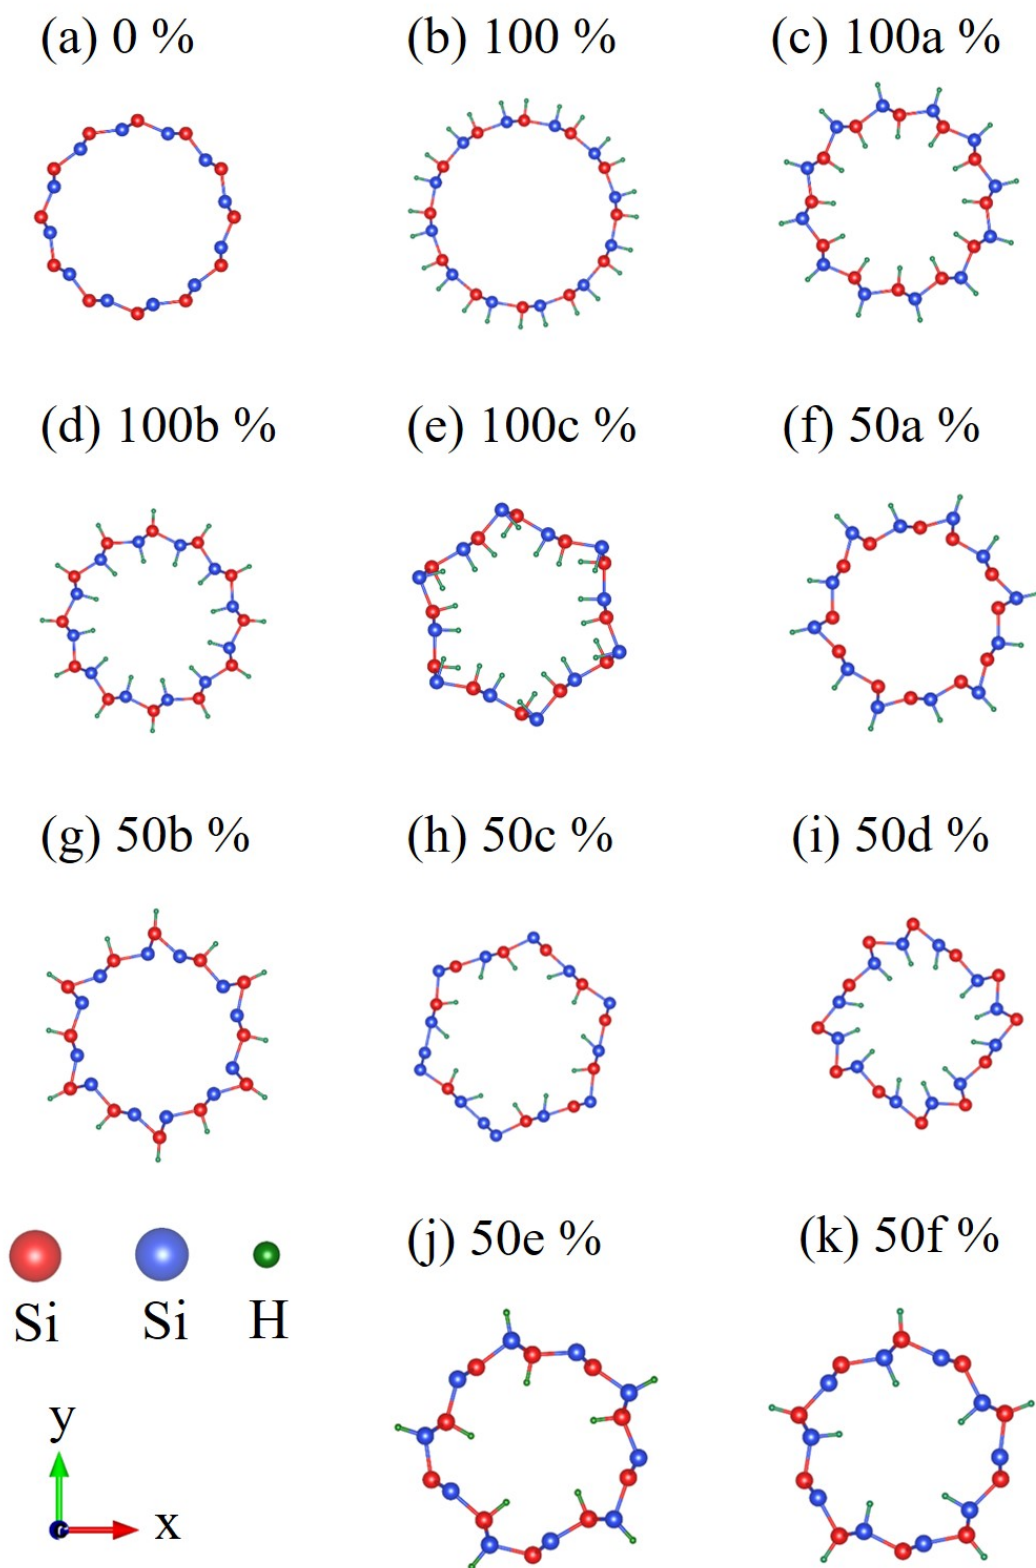

Figure S3: Cross-sectional views of (a) pure and (b)-(k) hydrogenated Si(6,6) NTs with various adsorption types and concentrations.

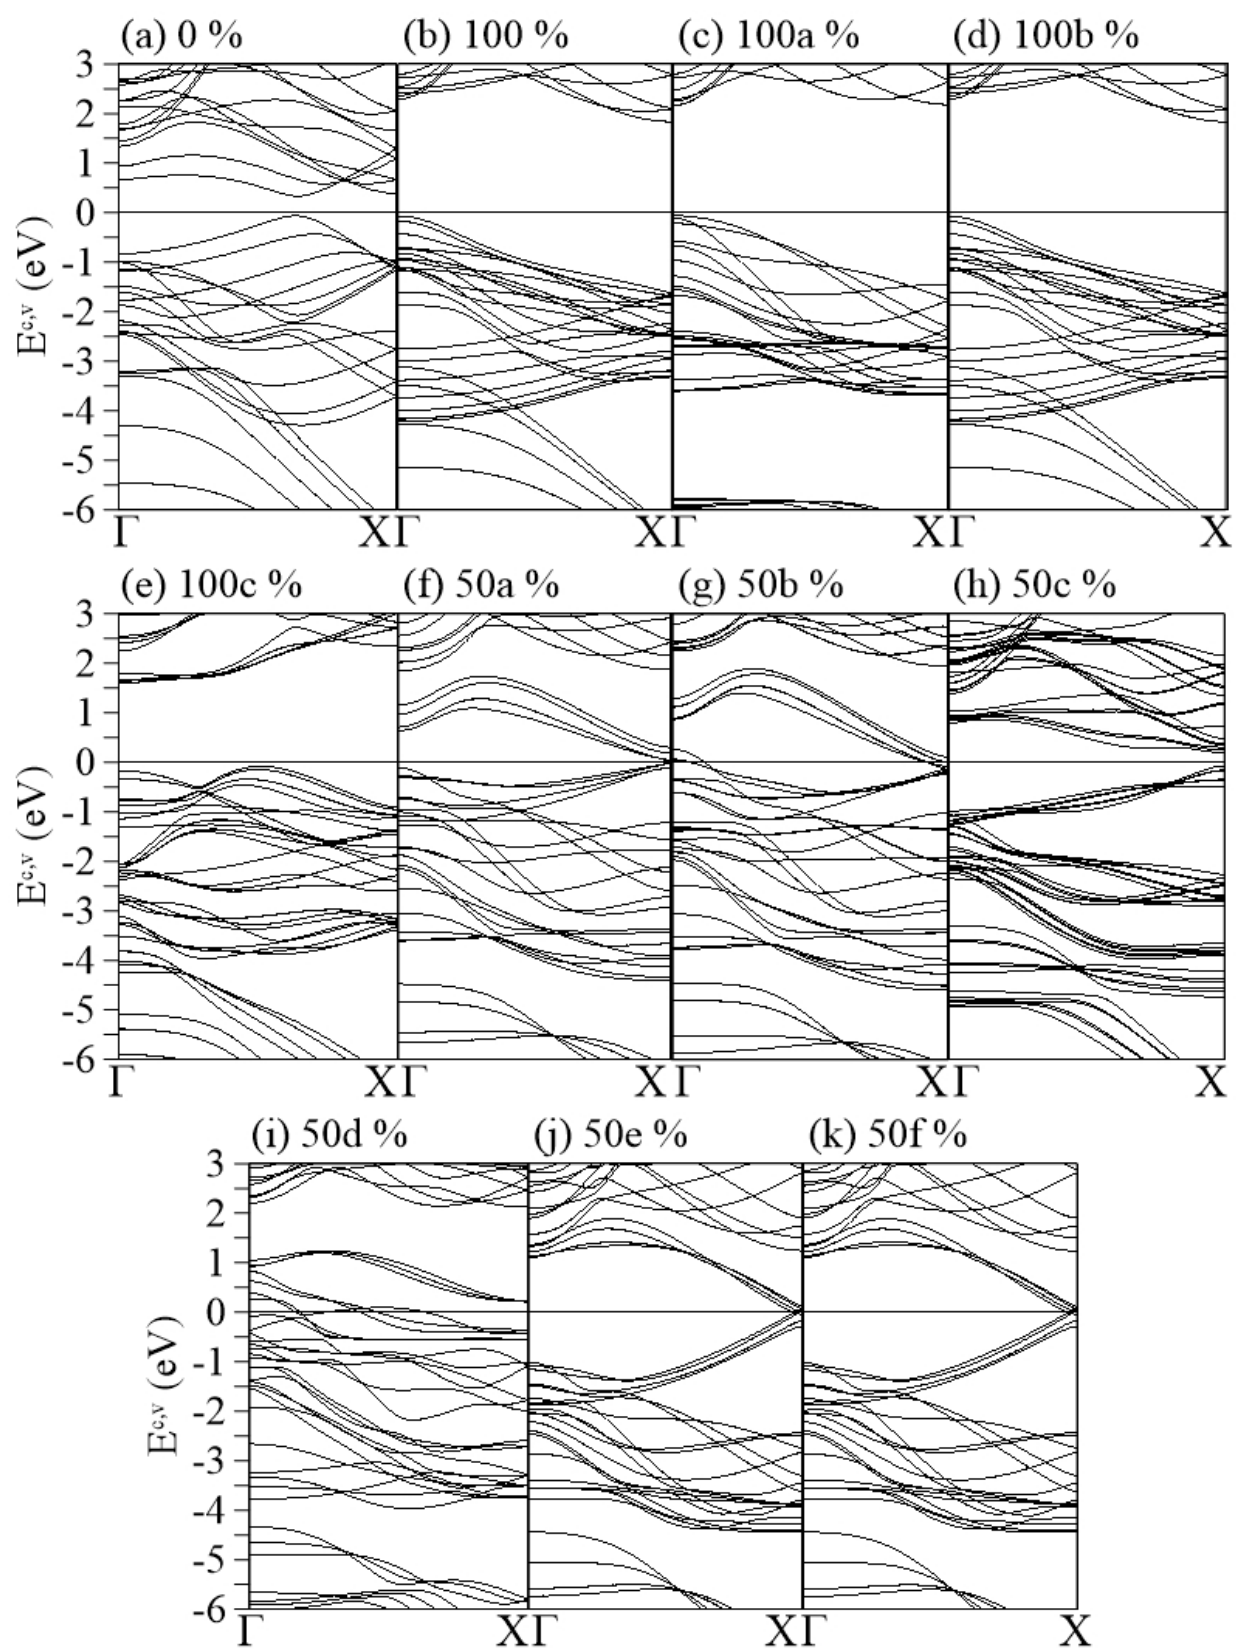

Figure S4: Band structures of (a) pure and (b)-(k) hydrogenated Si(6,6) NTs with various adsorption types and concentrations.

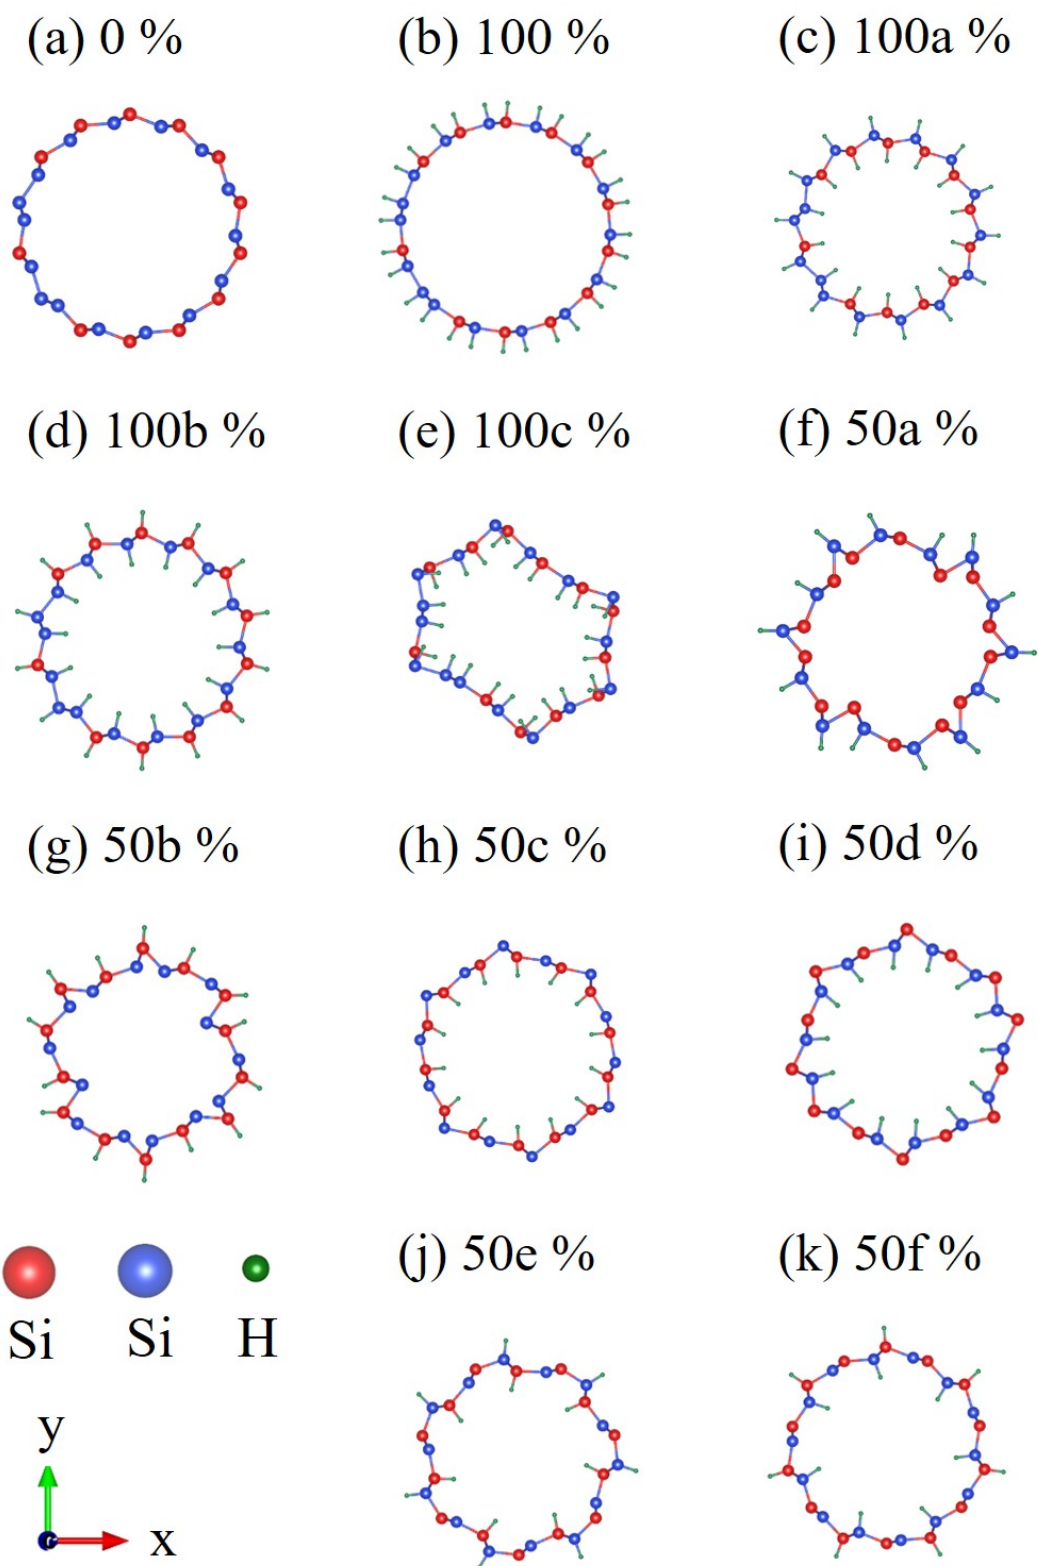

Figure S5: Cross-sectional views of (a) pure and (b)-(k) hydrogenated Si(7,7) NTs with various adsorption types and concentrations.



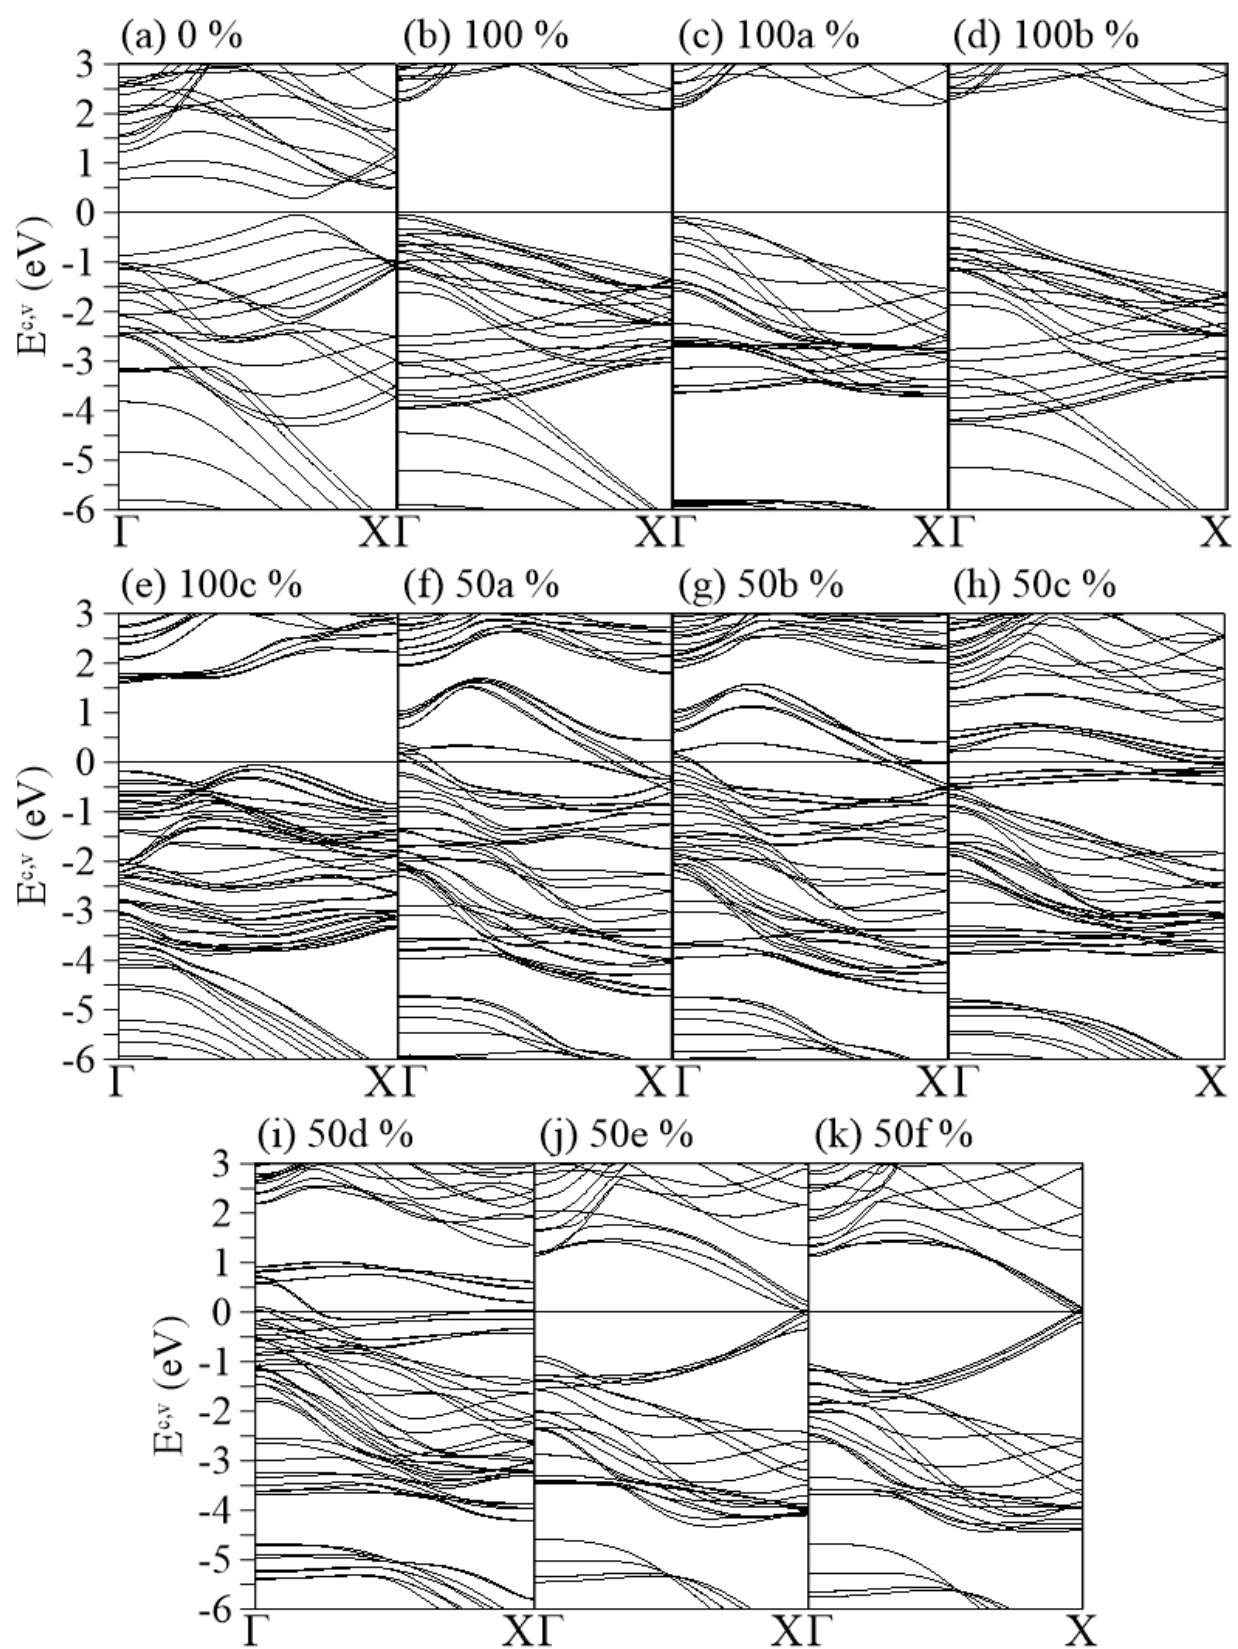

Figure S6: Band structures of (a) pure and (b)-(k) hydrogenated Si(7,7) NTs with various adsorption types and concentrations.

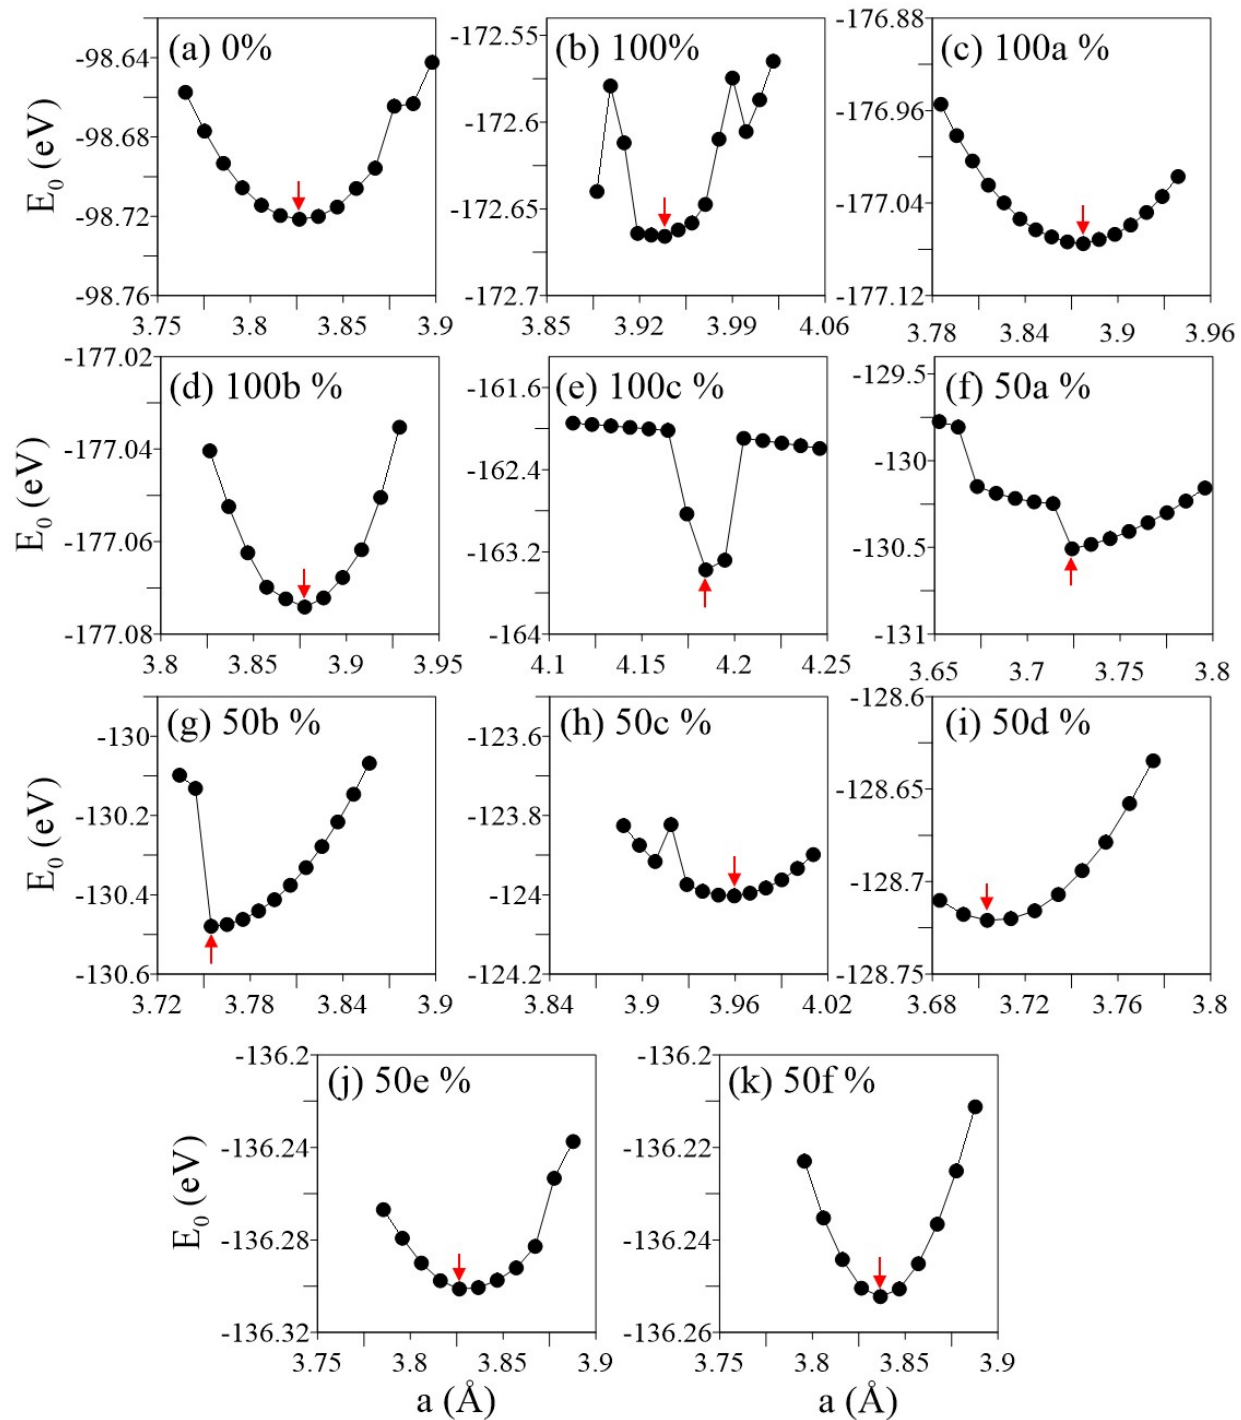

Figure S7: The lowest total energy  $E_0$  as a function of the lattice constant “ $a$ ” for (a) pure and (b)-(k) hydrogenated Si(5,5) NTs with various adsorption types and concentrations.

Red arrows indicate the minimum  $E_0$  for each case.
